# Supplementary material
Source: MDPI journal article supplement (https://www.mdpi.com/2071-1050/13/3/1347)
Supplement: s1 [file s1]

## Annex 1

Summary of the major ion chemistry of groundwater in the study area (PM = hand-dug well; PT = deep well; S, SAN = spring)

| SAMPLE  | DATE     | LOCATION     | pH  | EC<br>( $\mu\text{S}/\text{cm}$ ) | Na <sup>+</sup><br>(mg/l) | K <sup>+</sup><br>(mg/l) | Ca <sup>2+</sup><br>(mg/l) | Mg <sup>2+</sup><br>(mg/l) | Li <sup>+</sup><br>(mg/l) | NH <sub>4</sub> <sup>+</sup><br>(mg/l) | Cl <sup>-</sup><br>(mg/l) | F <sup>-</sup><br>(mg/l) | Br <sup>-</sup><br>(mg/l) | HCO <sub>3</sub> <sup>-</sup><br>(mg/l) | CO <sub>3</sub> <sup>2-</sup><br>(mg/l) | SO <sub>4</sub> <sup>2-</sup><br>(mg/l) | NO <sub>3</sub> <sup>-</sup><br>(mg/l) | T<br>(°C) |
|---------|----------|--------------|-----|-----------------------------------|---------------------------|--------------------------|----------------------------|----------------------------|---------------------------|----------------------------------------|---------------------------|--------------------------|---------------------------|-----------------------------------------|-----------------------------------------|-----------------------------------------|----------------------------------------|-----------|
| PM11/c1 | 20-11-09 | Dawie Buku   | 6   | 306                               | 38.5                      | 5.6                      | 24.0                       | 5.6                        |                           |                                        | 6.6                       | 1.0                      | 0.1                       | 177.6                                   | 0.0                                     |                                         | 0.3                                    | 24.7      |
| PM12/c1 | 20-11-09 | Gubeta Dawie | 6.5 | 225                               | 32.5                      | 12.5                     | 11.0                       | 2.0                        |                           |                                        | 5.4                       | 0.7                      |                           | 124.5                                   | 0.0                                     |                                         | 1.8                                    | 25.5      |
| PM13/c1 | 20-11-09 | Dawe         | 6   | 314                               | 42.8                      |                          | 30.8                       | 4.7                        |                           |                                        | 2.0                       | 1.3                      |                           | 205.5                                   | 0.0                                     | 2.3                                     | 0.2                                    | 27.8      |
| PM14/c1 | 20-11-09 | Dawe Kurke   | 6.5 | 239                               | 34.6                      | 2.3                      | 14.0                       | 3.5                        |                           |                                        | 1.7                       | 1.1                      |                           | 141.6                                   | 0.0                                     | 1.8                                     |                                        | 26.4      |
| PM15/c1 | 20-11-09 | Totoke       | 6.5 | 233                               | 42.2                      | 2.1                      | 13.6                       | 1.6                        | 0.1                       |                                        | 1.5                       | 1.8                      |                           | 139.1                                   | 0.0                                     | 1.7                                     |                                        | 29        |
| PM16/c1 | 02-12-09 | Tena Kela    | 6.5 | 109                               | 9.2                       | 3.4                      | 11.5                       | 1.4                        |                           |                                        | 0.5                       | 0.2                      |                           | 63.5                                    | 0.0                                     | 0.9                                     | 0.1                                    | 22.3      |
| PM17/c1 | 02-12-09 | Faji Meti    | 9   | 801                               | 117.7                     | 30.9                     | 29.7                       | 5.3                        |                           |                                        | 14.5                      | 0.7                      |                           | 399.3                                   | 4.9                                     | 42.3                                    | 6.4                                    | 19.6      |
| PM17/c4 | 02-12-09 | Faji Meti    | 9   | 801                               | 139.2                     | 16.5                     | 15.3                       | 1.6                        |                           |                                        | 16.0                      | 1.0                      | 0.1                       | 285.6                                   | 12.4                                    | 24.4                                    | 36.4                                   | 19.6      |
| PM18/c1 | 07-12-09 | Wallashe     | 6   | 211                               | 11.8                      | 4.1                      | 29.4                       | 2.2                        |                           |                                        | 2.0                       | 0.4                      |                           | 119.6                                   | 0.0                                     | 1.0                                     |                                        | 19.3      |
| PM19/c1 | 07-12-09 | Molele Dhoka | 7   | 346                               | 26.0                      | 11.9                     | 36.1                       | 3.4                        | 0.1                       |                                        | 5.7                       | 0.4                      |                           | 195.3                                   | 0.0                                     | 5.0                                     |                                        | 21.5      |
| PM2/c1  | 17-11-09 | Hiro         | 6.5 | 1401                              | 27.9                      | 20.2                     | 59.3                       | 6.2                        |                           | 0.9                                    | 12.9                      | 0.6                      |                           | 235.8                                   | 0.0                                     | 9.1                                     | 15.5                                   | 24        |
| PM3/c1  | 18-11-09 | Farye Wondo  | 9   | 996                               | 240.1                     | 23.4                     | 12.3                       | 2.4                        |                           |                                        | 13.5                      | 2.0                      |                           | 510.1                                   | 45.6                                    | 14.7                                    |                                        | 17.6      |
| PM4/c1  | 18-11-09 | Cherako      | 6   | 139                               | 13.1                      | 2.7                      | 14.3                       | 3.1                        |                           |                                        | 1.8                       | 0.4                      |                           | 85.4                                    | 0.0                                     |                                         | 0.4                                    | 18.8      |
| PM5/c1  | 18-11-09 | Gutu Danissa | 6.5 | 139                               | 9.8                       | 8.7                      | 15.2                       | 0.9                        | 0.0                       |                                        | 0.6                       | 0.1                      |                           | 83.0                                    | 0.0                                     | 1.2                                     | 0.2                                    | 17.6      |
| PM6/c1  | 18-11-09 | Sotira       | 7   | 439                               | 57.2                      | 17.2                     | 40.9                       | 3.7                        |                           |                                        | 3.3                       | 0.5                      |                           | 283.4                                   | 0.0                                     | 3.2                                     |                                        | 20        |

## Annex 1

Summary of the major ion chemistry of groundwater in the study area (PM = hand-dug well; PT = deep well; S, SAN = spring)

| SAMPLE   | DATE     | LOCATION          | pH  | EC<br>( $\mu$ S/cm) | Na <sup>+</sup><br>(mg/l) | K <sup>+</sup><br>(mg/l) | Ca <sup>2+</sup><br>(mg/l) | Mg <sup>2+</sup><br>(mg/l) | Li <sup>+</sup><br>(mg/l) | NH <sub>4</sub> <sup>+</sup><br>(mg/l) | Cl <sup>-</sup><br>(mg/l) | F <sup>-</sup><br>(mg/l) | Br <sup>-</sup><br>(mg/l) | HCO <sub>3</sub> <sup>-</sup><br>(mg/l) | CO <sub>3</sub> <sup>2-</sup><br>(mg/l) | SO <sub>4</sub> <sup>2-</sup><br>(mg/l) | NO <sub>3</sub> <sup>-</sup><br>(mg/l) | T<br>(°C) |
|----------|----------|-------------------|-----|---------------------|---------------------------|--------------------------|----------------------------|----------------------------|---------------------------|----------------------------------------|---------------------------|--------------------------|---------------------------|-----------------------------------------|-----------------------------------------|-----------------------------------------|----------------------------------------|-----------|
| PM7/c1   | 20-11-09 | Boret<br>Barkota  | 7   | 692                 | 179.4                     | 5.6                      | 1.8                        | 2.9                        |                           |                                        | 9.0                       | 3.7                      |                           | 413.5                                   | 0.0                                     | 12.9                                    | 0.1                                    | 23.8      |
| PT10/c1  | 24-11-09 | Ropi              | 7.5 | 694                 | 147.1                     | 13.3                     | 32.0                       | 9.1                        |                           |                                        | 4.0                       | 2.8                      |                           | 486.8                                   | 0.0                                     | 4.2                                     |                                        | 30        |
| PT14/c1  | 30-11-09 | Saio Maja         | 6.5 | 262                 | 33.7                      | 3.6                      | 19.4                       | 3.8                        |                           |                                        | 2.3                       | 1.8                      |                           | 153.8                                   | 0.0                                     | 1.4                                     | 0.1                                    | 21.1      |
| PT15/c1  | 30-11-09 | Adaba Tita<br>11  | 6.5 | 221                 | 27.5                      | 5.0                      | 16.7                       | 3.7                        |                           |                                        | 1.0                       | 1.2                      |                           | 131.8                                   | 0.0                                     | 0.6                                     |                                        | 23.4      |
| PT15x/c1 | 01-10-09 | Shashamane        |     | 1453                | 302.2                     | 22.1                     | 53.5                       | 44.2                       | 0.8                       |                                        | 30.4                      | 13.1                     |                           | 1004.4                                  | 0.0                                     | 2.7                                     | 5.9                                    | 24        |
| PT2/c1   | 10-11-09 | Rafu<br>Hargisa   | 6.5 | 218                 | 35.2                      | 3.2                      | 14.7                       | 2.2                        |                           |                                        | 2.5                       | 1.2                      |                           | 135.2                                   | 0.0                                     | 1.6                                     |                                        | 27.2      |
| PT20/c1  | 30-11-09 | Adaba Tita<br>13  | 6   | 188                 | 25.3                      | 3.9                      | 12.1                       | 3.4                        | 0.1                       |                                        | 2.0                       | 0.8                      |                           | 107.9                                   | 0.0                                     | 1.2                                     |                                        | 24.1      |
| PT22/c1  | 30-11-09 | Mako Oda          | 6   | 220                 | 29.5                      | 3.6                      | 15.5                       | 3.5                        |                           |                                        | 1.4                       | 0.7                      |                           | 129.4                                   | 0.0                                     | 0.9                                     |                                        | 23.6      |
| PT24/c3  | 02-12-09 | Jallo Dida        | 6.5 | 238                 | 40.4                      | 3.4                      | 12.1                       | 2.0                        |                           |                                        | 2.6                       | 2.4                      |                           | 139.1                                   | 0.0                                     | 1.7                                     |                                        | 24.8      |
| PT25/c1  | 02-12-09 | Faji Goba         | 5.5 | 144                 | 24.8                      | 2.7                      | 8.7                        | 1.4                        | 0.0                       |                                        | 1.2                       | 2.5                      |                           | 87.9                                    | 0.0                                     | 0.2                                     |                                        | 24.1      |
| PT26/c1  | 03-12-09 | Gorbi Arba        | 7   | 302                 | 38.0                      | 2.5                      | 28.2                       | 4.3                        |                           |                                        | 2.9                       | 1.2                      |                           | 181.4                                   | 0.0                                     | 1.5                                     |                                        | 25.3      |
| PT27/c1  | 03-12-09 | Basaku Elala      | 6   | 194                 | 12.8                      | 5.1                      | 14.0                       | 2.6                        |                           |                                        | 7.1                       | 0.2                      |                           | 30.5                                    | 0.0                                     | 4.3                                     | 45.7                                   | 22.9      |
| PT3/c1   | 10-11-09 | Woyo<br>Medanalem | 6.5 | 236                 | 38.5                      | 3.2                      | 17.3                       | 2.8                        |                           |                                        | 2.3                       | 1.7                      |                           | 148.9                                   | 0.0                                     | 2.0                                     | 0.2                                    | 28        |
| PT4/c1   | 10-11-09 | Kersa Korke       | 6   | 219                 | 38.7                      | 3.2                      | 10.5                       | 2.7                        |                           |                                        | 1.6                       | 1.5                      |                           | 133.3                                   | 0.0                                     | 2.3                                     |                                        | 27.8      |
| PT5/c1   | 10-11-09 | Kersaelala        | 6   | 216                 | 37.9                      | 2.7                      | 10.2                       | 2.9                        |                           |                                        | 1.7                       | 1.5                      |                           | 131.8                                   | 0.0                                     | 1.4                                     |                                        | 23.6      |

## Annex 1

Summary of the major ion chemistry of groundwater in the study area (PM = hand-dug well; PT = deep well; S, SAN = spring)

| SAMPLE | DATE     | LOCATION            | pH  | EC<br>( $\mu\text{S}/\text{cm}$ ) | Na <sup>+</sup><br>(mg/l) | K <sup>+</sup><br>(mg/l) | Ca <sup>2+</sup><br>(mg/l) | Mg <sup>2+</sup><br>(mg/l) | Li <sup>+</sup><br>(mg/l) | NH <sub>4</sub> <sup>+</sup><br>(mg/l) | Cl <sup>-</sup><br>(mg/l) | F <sup>-</sup><br>(mg/l) | Br <sup>-</sup><br>(mg/l) | HCO <sub>3</sub> <sup>-</sup><br>(mg/l) | CO <sub>3</sub> <sup>2-</sup><br>(mg/l) | SO <sub>4</sub> <sup>2-</sup><br>(mg/l) | NO <sub>3</sub> <sup>-</sup><br>(mg/l) | T<br>(°C) |
|--------|----------|---------------------|-----|-----------------------------------|---------------------------|--------------------------|----------------------------|----------------------------|---------------------------|----------------------------------------|---------------------------|--------------------------|---------------------------|-----------------------------------------|-----------------------------------------|-----------------------------------------|----------------------------------------|-----------|
| PT6/c1 | 13-11-09 | Ali Woyo            | 5.5 | 316                               | 20.0                      | 4.6                      | 14.7                       | 2.2                        |                           |                                        | 2.6                       | 0.4                      |                           | 97.6                                    | 0.0                                     | 2.5                                     | 0.2                                    | 24.7      |
| PT7/c1 | 13-11-09 | Roge                | 6.5 | 235                               | 59.9                      | 2.6                      | 14.0                       | 2.7                        | 0.2                       |                                        | 2.2                       | 1.4                      |                           | 197.7                                   | 0.0                                     | 2.6                                     | 0.1                                    | 24.1      |
| PT9/c1 | 24-11-09 | Loke Duke           | 8.5 | 578                               | 144.3                     | 11.7                     | 2.1                        | 2.9                        |                           |                                        | 9.0                       | 5.4                      | 0.1                       | 322.9                                   | 20.8                                    |                                         | 3.3                                    | 26.9      |
| S1/c1  | 14-10-09 | Haro                | 6   | 156                               | 11.0                      | 1.7                      | 3.1                        | 1.0                        | 0.0                       |                                        | 3.2                       | 0.1                      | 0.0                       | 24.4                                    | 0.0                                     | 0.0                                     | 15.4                                   | 19.3      |
| S10/c1 | 19-10-09 | Lencho              | 6   | 107                               | 6.3                       | 2.6                      | 4.7                        | 1.2                        | 0.0                       |                                        | 8.1                       | 0.0                      | 0.0                       | 19.6                                    | 0.0                                     | 2.0                                     | 2.9                                    | 18.5      |
| S12/c1 | 14-11-09 | Dagaga              | 5.5 | 163                               | 11.8                      | 4.9                      | 11.6                       | 2.9                        |                           |                                        | 4.0                       | 0.1                      |                           | 34.2                                    | 0.0                                     | 3.1                                     | 42.1                                   | 21.2      |
| S13/c1 | 01-12-09 | Bedesa              |     | 113                               | 6.8                       | 3.5                      | 8.0                        | 2.1                        | 0.0                       |                                        | 1.9                       | 0.2                      |                           | 51.5                                    | 0.0                                     | 0.8                                     |                                        | 22        |
| S15/c1 | 02-12-09 | Wondo Gennet        | 8   | 1969                              | 516.6                     | 32.5                     | 22.6                       | 0.0                        | 1.2                       |                                        | 76.1                      | 28.6                     | 0.1                       | 1176.5                                  | 0.0                                     | 96.3                                    | 0.0                                    |           |
| S16/c1 | 02-12-09 | Shashamane          | 5.5 | 264                               | 38.4                      | 7.9                      | 6.8                        | 1.6                        |                           |                                        | 7.0                       | 0.2                      | 0.2                       | 38.1                                    | 0.0                                     | 9.5                                     | 70.1                                   | 24        |
| S17/c1 | 04-12-09 | Jighesa             | 5.5 | 190                               | 19.6                      | 7.4                      | 14.2                       | 2.8                        |                           |                                        | 10.8                      | 0.4                      | 0.1                       | 83.1                                    | 0.0                                     |                                         | 12.2                                   | 20.4      |
| S18/c1 | 04-12-09 | Turuze Wetera Elemo | 5.5 | 156                               | 12.7                      | 3.0                      | 38.5                       | 7.0                        |                           |                                        | 17.5                      | 0.2                      |                           | 112.8                                   | 0.0                                     | 37.3                                    | 15.7                                   | 20        |
| S2/c1  | 16-10-09 | Wolena              | 5.5 | 122                               | 9.1                       | 5.1                      | 5.2                        | 2.1                        |                           |                                        | 3.8                       | 0.0                      |                           | 22.2                                    | 0.0                                     | 1.6                                     | 33.5                                   | 18.5      |
| S3/c1  | 16-10-09 | Wolda Aba Shala     | 6   | 287                               | 12.1                      | 5.5                      | 14.1                       | 2.5                        |                           | 0.5                                    | 8.6                       | 0.1                      | 0.1                       | 70.5                                    | 0.0                                     | 4.2                                     | 13.8                                   | 22.8      |
| S4/c1  | 16-10-09 | Watera Fufa         | 5.5 | 146                               | 12.2                      | 1.9                      | 5.3                        | 1.8                        | 0.0                       |                                        | 3.3                       | 0.0                      | 0.1                       | 28.1                                    | 0.0                                     |                                         | 32.3                                   | 25        |

## Annex 1

Summary of the major ion chemistry of groundwater in the study area (PM = hand-dug well; PT = deep well; S, SAN = spring)

| SAMPLE  | DATE     | LOCATION    | pH  | EC<br>( $\mu\text{S}/\text{cm}$ ) | Na <sup>+</sup><br>(mg/l) | K <sup>+</sup><br>(mg/l) | Ca <sup>2+</sup><br>(mg/l) | Mg <sup>2+</sup><br>(mg/l) | Li <sup>+</sup><br>(mg/l) | NH <sub>4</sub> <sup>+</sup><br>(mg/l) | Cl <sup>-</sup><br>(mg/l) | F <sup>-</sup><br>(mg/l) | Br <sup>-</sup><br>(mg/l) | HCO <sub>3</sub> <sup>-</sup><br>(mg/l) | CO <sub>3</sub> <sup>2-</sup><br>(mg/l) | SO <sub>4</sub> <sup>2-</sup><br>(mg/l) | NO <sub>3</sub> <sup>-</sup><br>(mg/l) | T<br>(°C) |
|---------|----------|-------------|-----|-----------------------------------|---------------------------|--------------------------|----------------------------|----------------------------|---------------------------|----------------------------------------|---------------------------|--------------------------|---------------------------|-----------------------------------------|-----------------------------------------|-----------------------------------------|----------------------------------------|-----------|
| S5/c1   | 18-10-09 | Hadama      | 6.5 | 248                               | 21.0                      | 6.6                      | 10.7                       | 2.4                        |                           | 1.2                                    | 21.4                      | 0.1                      | 0.1                       | 67.1                                    | 0.0                                     |                                         |                                        | 20.6      |
| S6/c1   | 18-10-09 | Abune       | 5.5 | 109                               | 19.4                      | 2.8                      | 5.8                        | 1.6                        | 0.0                       |                                        | 5.3                       | 0.6                      |                           | 48.8                                    | 0.0                                     | 3.3                                     | 17.9                                   | 19.7      |
| S7/c1   | 18-10-09 | Hasu Kumalo | 6.5 | 191                               | 17.5                      | 6.9                      | 11.0                       | 3.2                        |                           |                                        | 10.4                      | 0.3                      |                           | 45.4                                    | 0.0                                     | 13.8                                    | 27.8                                   | 20.5      |
| S8/c1   | 18-12-09 | Cewbote     | 6   | 141                               | 14.3                      | 4.2                      | 6.5                        | 2.0                        |                           |                                        | 7.4                       | 0.1                      |                           | 40.3                                    | 0.0                                     | 2.6                                     | 24.3                                   | 18.9      |
| S9/c1   | 19-10-09 | Ashu Shifa  | 6.5 | 84                                | 6.7                       | 2.9                      | 4.8                        | 1.2                        |                           |                                        | 3.4                       | 0.1                      |                           | 36.6                                    | 0.0                                     |                                         | 3.4                                    | 18.2      |
| SAN1/c1 | 07-12-09 | Gado Chafe  | 6   | 71                                | 32.8                      | 7.1                      | 9.3                        | 1.9                        | 0.0                       |                                        | 4.0                       | 0.0                      | 0.1                       | 106.2                                   | 0.0                                     |                                         | 10.6                                   | 20        |
| SAN2/c1 | 07-12-09 | Matagola    | 6   | 80                                | 7.5                       | 3.6                      | 5.0                        | 1.6                        |                           |                                        | 3.7                       | 0.1                      | 0.1                       | 17.1                                    | 0.0                                     |                                         | 24.5                                   | 22        |
| SAN4/c1 | 07-12-09 | Gobani      | 5.5 | 57                                | 7.4                       | 3.8                      | 6.4                        | 1.5                        |                           |                                        | 1.1                       | 0.2                      |                           | 46.4                                    | 0.0                                     | 0.7                                     |                                        | 18.6      |
